# Supplementary material for: Influence of template content on selective synthesis of SAPO-18, SAPO-18/34 intergrowth and SAPO-34 molecular sieves used for methanol-to-olefins process
Source: Royal Society of Chemistry journal article supplement (doi:10.1039/c6ra23048b), 2016-01-01
Supplement: c6ra23048b1.pdf [file c6ra23048b1.pdf]

## Supplementary data

### **Influence of Template Content on Selective Synthesis of SAPO-18, SAPO-18/34 Intergrowth and SAPO-34 Molecular Sieves Used for Methanol-to-Olefins Process**

**Ya Wang, Sheng-Li Chen<sup>1</sup>, Yong-Jie Jiang, Ying-Qian Cao, Fen Chen, Wei-Ke Chang and Yu-Li Gao**

State Key Laboratory of Heavy Oil Processing, China University of Petroleum,

Beijing, 102249, PR China

---

<sup>1</sup> Corresponding author: Professor Sheng-Li Chen, Phone: 86-10-89733396, Fax: 86-10-69724721, Email: slchen@cup.edu.cn

**Table S1.** The carbon content and calculated template weight content of as-synthesized samples.

| Sample            | Carbon content <sup>a</sup><br>(wt%) | Template content<br>calculated based on<br>(CH <sub>3</sub> CH <sub>2</sub> ) <sub>4</sub> N-OH (wt%) | Template content<br>calculated based on<br>(CH <sub>3</sub> CH <sub>2</sub> ) <sub>4</sub> N <sup>+</sup> (wt%) |
|-------------------|--------------------------------------|-------------------------------------------------------------------------------------------------------|-----------------------------------------------------------------------------------------------------------------|
| 1.6T (SAPO-18)    | 15.68                                | 24.03                                                                                                 | 21.26                                                                                                           |
| 2.0T (SAPO-18/34) | 12.15                                | 18.63                                                                                                 | 16.48                                                                                                           |
| 2.4T (SAPO-34)    | 10.82                                | 16.59                                                                                                 | 14.67                                                                                                           |

<sup>a</sup> Carbon content (wt%)= The mass of carbon of as-synthesized sample/ The mass of as-synthesized sample × 100%.

The carbon content of the deactivated catalysts (methanol conversion was less than 50%) were measured on a HIR-944B infrared carbon and sulfur analyzer (Wuxi High-speed analyzer Co., China), samples were dried before analysis. The mass percentage of templates for as-synthesized samples were calculated based on (CH<sub>3</sub>CH<sub>2</sub>)<sub>4</sub>N-OH or (CH<sub>3</sub>CH<sub>2</sub>)<sub>4</sub>N<sup>+</sup> respectively.
